# Supplementary material
Source: publisher site journal article supplement (https://www.dovepress.com/article/342804)
Supplement: Supplementary file 1 [file get_supplementary_file.php]

**Supplementary Table 1** Genetic heterogeneity of Meier-Gorlin syndrome

| **Phenotype** | **Inheritance** | **# OMIM** | **Gene** | **Protein function** |
| --- | --- | --- | --- | --- |
| Meier-Gorlin syndrome 1 | AR | 224690 | *ORC1* | ORC1 is a subunit of the origin recognition complex (ORC), a regulator of centriole and centrosome reduplication, and the initiation of DNA replication.1 |
| Meier-Gorlin syndrome 2 | AR | 613800 | *ORC4* | ORC4 is a subunit of the origin recognition complex, a regulator of the initiation of DNA replication.2 |
| Meier-Gorlin syndrome 3 | AR | 613803 | *ORC6* | ORC6 is a subunit of the origin recognition complex, implicating in coordinating DNA replication, chromosome segregation, and cytokinesis.3 |
| Meier-Gorlin syndrome 4 | AR | 613804 | *CDT1* | CDT1 a licensing factor limiting DNA replication during cell cycle.4 |
| Meier-Gorlin syndrome 5 | AR | 613805 | *CDC6* | CDC6 is a regulator of DNA replication, playing important role in the assembly of prereplicative complexes at ORC during the G1 phase of the cell division cycle, and the activation and maintenance of the checkpoint mechanisms that coordinate S phase and mitosis.5 |
| Meier-Gorlin syndrome 6 | AD | 616835 | *GMNN* | GMNN is the DNA replication inhibitor.6 |
| Meier-Gorlin syndrome 7 | AR | 617063 | *CDC45L* | CDC45L is essential for establishment of an initiation complex at DNA origins, and for chromosome unwinding and DNA synthesis at replication forks.7 |
| Meier-Gorlin syndrome 8 | AR | 617564 | *MCM5* | MCM5 is one the six subunits composing the minichromosome maintenance (MCM) complex involved in unwinding DNA, DNA replication licensing factor, limiting the replication to once per cell cycle.8 |
| Meier-Gorlin syndrome11 | AR | No | *MCM3* | MCM3 is one the six subunits composing the MCM complex involved in unwinding DNA, DNA replication licensing factor, limiting the replication to once per cell cycle.8 |
| Meier-Gorlin syndrome11 | AR | No | *MCM7* | MCM7 is one the six subunits composing the MCM complex involved in unwinding DNA, DNA replication licensing factor, limiting the replication to once per cell cycle.8 |
| Meier-Gorlin syndrome12 | AR | No | *GINS2* | GINS2 is a unit of GINS complex playing role for establishing the initiation complex after prereplicative complex assembly and for the normal progression of the replisome.9 |
| Meier-Gorlin syndrome13 | AR | No | *DONSON* | DONSON is component of the replisome, ensuring replication fork stability, and promoting efficient activation of cell cycle checkpoints.10 |

1.Hemerly AS, Prasanth SG, Siddiqui K, Stillman B. Orc1 controls centriole and centrosome copy number in human cells. *Science*. 2009;323(5915):789-793. doi:10.1126/science.1166745

2. Bicknell LS, Bongers EM, Leitch A, et al. Mutations in the pre-replication complex cause Meier-Gorlin syndrome. *Nat Genet.* 2011;43(4):356-359. Published 2011 Feb 27. doi:10.1038/ng.775

3. Prasanth SG, Prasanth KV, Stillman B. Orc6 involved in DNA replication, chromosome segregation, and cytokinesis. *Science*. 2002;297(5583):1026-1031. doi:10.1126/science.1072802

4. Wohlschlegel JA, Dwyer BT, Dhar SK, Cvetic C, Walter JC, Dutta A. Inhibition of eukaryotic DNA replication by geminin binding to Cdt1. *Science*. 2000;290(5500):2309-2312. doi:10.1126/science.290.5500.2309

5. Borlado LR, Méndez J. CDC6: from DNA replication to cell cycle checkpoints and oncogenesis. *Carcinogenesis*. 2008;29(2):237-243. doi:10.1093/carcin/bgm268

6. Burrage LC, Charng WL, Eldomery MK, et al. De Novo GMNN Mutations Cause Autosomal-Dominant Primordial Dwarfism Associated with Meier-Gorlin Syndrome. *Am J Hum Genet*. 2015;97(6):904-913. doi:10.1016/j.ajhg.2015.11.006

7. Simon AC, Sannino V, Costanzo V, Pellegrini L. Structure of human Cdc45 and implications for CMG helicase function. *Nat Commun*. 2016;7:11638. Published 2016 May 18. doi:10.1038/ncomms11638

8. Bochman ML, Schwacha A. The Mcm complex: unwinding the mechanism of a replicative helicase. *Microbiol Mol Biol Rev*. 2009;73(4):652-683. doi:10.1128/MMBR.00019-09

9. Kamada K, Kubota Y, Arata T, Shindo Y, Hanaoka F. Structure of the human GINS complex and its assembly and functional interface in replication initiation. *Nat Struct Mol Biol*. 2007;14(5):388-396. doi:10.1038/nsmb1231

10. Reynolds JJ, Bicknell LS, Carroll P, et al. Mutations in DONSON disrupt replication fork stability and cause microcephalic dwarfism. *Nat Genet*. 2017;49(4):537-549. doi:10.1038/ng.3790

11. Knapp KM, Jenkins DE, Sullivan R, et al. MCM complex members MCM3 and MCM7 are associated with a phenotypic spectrum from Meier-Gorlin syndrome to lipodystrophy and adrenal insufficiency. *Eur J Hum Genet*. 2021;29(7):1110-1120. doi:10.1038/s41431-021-00839-4

12. Biallelic *GINS2* variant p.(Arg114Leu) causes Meier-Gorlin

syndrome with craniosynostosis

13. Knapp KM, Sullivan R, Murray J, et al. Linked-read genome sequencing identifies biallelic pathogenic variants in *DONSON* as a novel cause of Meier-Gorlin syndrome. *J Med Genet*. 2020;57(3):195-202. doi:10.1136/jmedgenet-2019-106396

**Supplementary Table 2** Characterization of identified variants in the *CDC6* gene (NM_001254.3)

| **Position (GRCh37/hg19)** | **Exon** | **Position, cDNA** | **Impact** | **Allele frequency** | **Coverage Depth** | **Inheritance** |
| --- | --- | --- | --- | --- | --- | --- |
| chr17:38447361A>G | 3 | c.230A>G | p.(Lys77Arg) | n/d | 62х | maternal |
| chr17:38447363C>T | 3 | c.232C>T | p.(Gln78Ter) | n/d | 62х | paternal |
